# Supplementary material
Source: PubMed Central journal article supplement (PMC8379324)
Supplement: 12250_2020_319_MOESM1_ESM.pdf [file 12250_2020_319_MOESM1_ESM.pdf]

## Electronic Supplementary Material

### Metagenomic Profiling of Viruses Associated with *Rhipicephalus microplus* Ticks in Yunnan Province, China

Junming Shi<sup>1,2</sup> • Shu Shen<sup>1</sup> • Hui Wu<sup>3,4</sup> • Yunzhi Zhang<sup>3</sup>✉ • Fei Deng<sup>1</sup>✉

1. State key laboratory of Virology and National Virus Resource center, Wuhan Institute of Virology, Chinese Academy of Sciences, Wuhan 430071, China
2. University of Chinese Academy of Sciences, Beijing 100049, China.
3. Institute of Preventive Medicine, School of Public Health, Dali University, Dali 671000, China
4. Xianning Center for Disease Control and Prevention, Xinanning 437000, China

Supporting information to DOI: 10.1007/s12250-020-00319-x

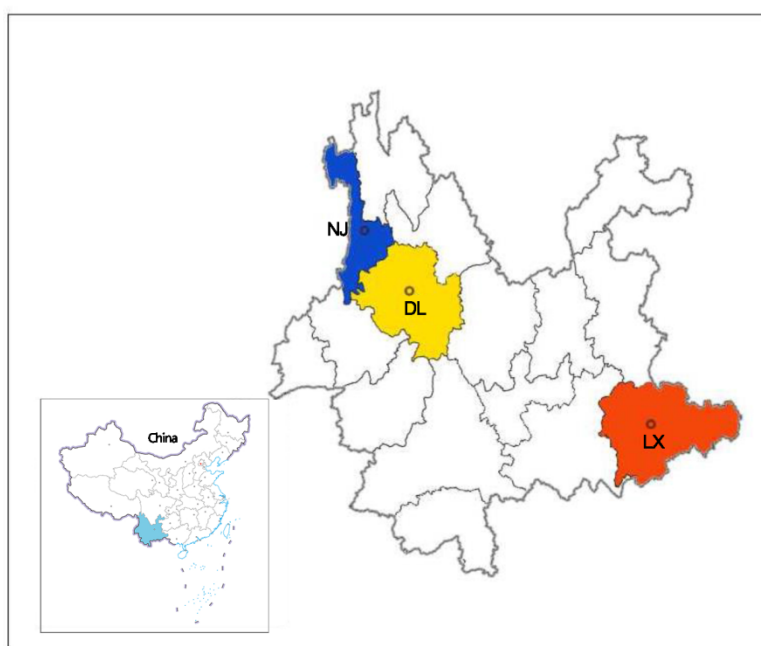

**Fig. S1** Tick collection sites. The Yunnan Province is highlighted in light blue within a map of China. And Nujiang Lisu Autonomous Prefecture (NJ), Dali Bai Autonomous Prefecture (DL) and Luxi County (LX) in Yunnan Province are respectively colored by dark blue, yellow and orange.

**Table S1.** Primer pairs used for PCR in molecular investigation of viruses

|             | Primer pairs | Sequence of primers       | Product length (bp) |
|-------------|--------------|---------------------------|---------------------|
| YN-MV1      | YN1/F1       | TCACTGAGCAGGAATACTTTG     | 530                 |
|             | YN1/R1       | CCTTAGATCGGACGACATAC      |                     |
|             | YN1/F1in     | TGAGCAGGAATACTTTGAT       | 480                 |
|             | YN1/R1in     | AATACTCCCTTGGACAGC        |                     |
|             | YN1/F2       | ACTACGCCCTGGTGAATC        | 497                 |
|             | YN1/R2       | GCCCTTGCCGCTATCTTA        |                     |
|             | YN1/F2in     | TCGCACGGTGTTCGTTCCCT      | 440                 |
|             | YN1/R2in     | GCCGCTATCTTATGTTCCTTCT    |                     |
| YN-rhabdoV1 | YN2/F1       | GGGTCAACTTCATGTTCCGGAC    | 427                 |
|             | YN2/R1       | GAGGCATCGCTTGGTCCTC       |                     |
|             | YN2/F1in     | ATCACATTTTGGAGTGGGCAA     | 339                 |
|             | YN2/R1in     | GGTTGCTGGCTTGCATTCTAC     |                     |
|             | YN2/F2       | GTCAAACGCCATCTTCGAAAA     | 518                 |
|             | YN2/R2       | CTCCTTGTGCCACTCCAATGT     |                     |
|             | YN2/F2in     | CTCACAGGATGGGACTGGTTT     | 455                 |
|             | YN2/R2in     | TCAGATGGAGTGAGATCCTCCC    |                     |
| YN-PLV1     | YN3/F1       | AGCGACTCAGGAACTCCACG      | 557                 |
|             | YN3/R1       | GACCCTTCCGTGCTCATTTT      |                     |
|             | YN3/F1in     | CCTACGGTTTGGCAGTCCTCA     | 481                 |
|             | YN3/R1in     | GTTTGCCAGATTCGTTCCCTC     |                     |
|             | YN3/F2       | GCCCTCATCATCAAAGAAACCA    | 524                 |
|             | YN3/R2       | ATCACTGCATCCGTGACCACCT    |                     |
|             | YN3/F2in     | TCCTGACCAGAGGAACGAATCT    | 375                 |
|             | YN3/R2in     | GACTCGGGGTTTCTTTTGCTGA    |                     |
| YN-flaviV   | YN4/F1       | GCTCAAGACCACTGTAGCGT      | 550                 |
|             | YN4/R1       | GCACTACACCCAATCACGGA      |                     |
|             | YN4/F1in     | TACGTGTCGGCGTACTGTTT      | 480                 |
|             | YN4/R1in     | CGGAGTACGTTAGGCAGCTC      |                     |
|             | YN4/F2       | TGGATCTCCCGTGCCATTTT      | 510                 |
|             | YN4/R2       | AGCATGGCAACTCACCTCAA      |                     |
|             | YN4/F2in     | GATCTTCGTGTCCCAACCCG      | 470                 |
|             | YN4/R2in     | CGTTCAAGAGGGCTTTGCTC      |                     |
| YN-BHKV2    | YN5/F1       | GGCTCGGCACTTCCTTTTC       | 510                 |
|             | YN5/R1       | CTGCCTTGCGGAGTTTTCCTAATA  |                     |
|             | YN5/F1in     | CCGCTACTGTGCTGAGGGAGGTT   | 200                 |
|             | YN5/R1in     | TCATCTGATTTACTGGGTTCTA    |                     |
| YN-MV2      | YN6/F1       | AGCCGCATGATCAGGGACAAG     | 533                 |
|             | YN6/R1       | ATAGGGCAGAGTACATAGAGC     |                     |
|             | YN6/F1in     | GTATGGGTGGTGGTGGAAATGTGTC | 370                 |
|             | YN6/R1in     | CTGGCGGGTGTGCTGGTTGG      |                     |

|          |          |                          |     |
|----------|----------|--------------------------|-----|
|          | YN6/F2   | GACGCAGGCACCCATTCTTG     |     |
|          | YN6/R2   | GGGGTCCAGTGCACCTCTTCTTG  | 455 |
|          | YN6/F2in | GCGGGTATAGCCACAAGTTCC    |     |
|          | YN6/R2in | CCCCCATGCCTGACGAT        | 288 |
| YN-PLV2  | YN7/F1   | CTCCGCCGGCTCCGCTCCTTC    |     |
|          | YN7/R1   | TTCCACTACTCCCGCTTCTTCAAA | 316 |
|          | YN7/F1in | TGCGTTCGAGGATCGGTTTT     |     |
|          | YN7/R1in | TGTTGGTGACATTCTGGGGT     | 144 |
| YN-FLV 1 | YN8/F1   | TGACGAAGGGCCCAAAGAGCAT   |     |
|          | YN8/R1   | GCGCGTCATCATCAACAAACAGAG | 266 |
|          | YN8/F1in | GCGGGGGCGGGTGTGTC        |     |
|          | YN8/R1in | AGAGCGCTGCCGGAATGTTGG    | 182 |
| YN-PLV3  | YN9/F1   | AGGCCACACTTTGCCTTAG      |     |
|          | YN9/R1   | GAAGGCCTGAGACCGATGAA     | 436 |
|          | YN9/F1in | CTCCACCACTTTGGCTCTGT     |     |
|          | YN9/R1in | GCACTGTTCTGACCTTGCCA     | 390 |
